# Supplementary figures and images for: Impact of Lifestyle Modifications on Alterations in Lipid and Glycemic Profiles and Uric Acid Values in a Pediatric Population
Source: MDPI journal article supplement (doi:10.3390/nu14051034), 2022-02-28

## Supplementary Figure S1

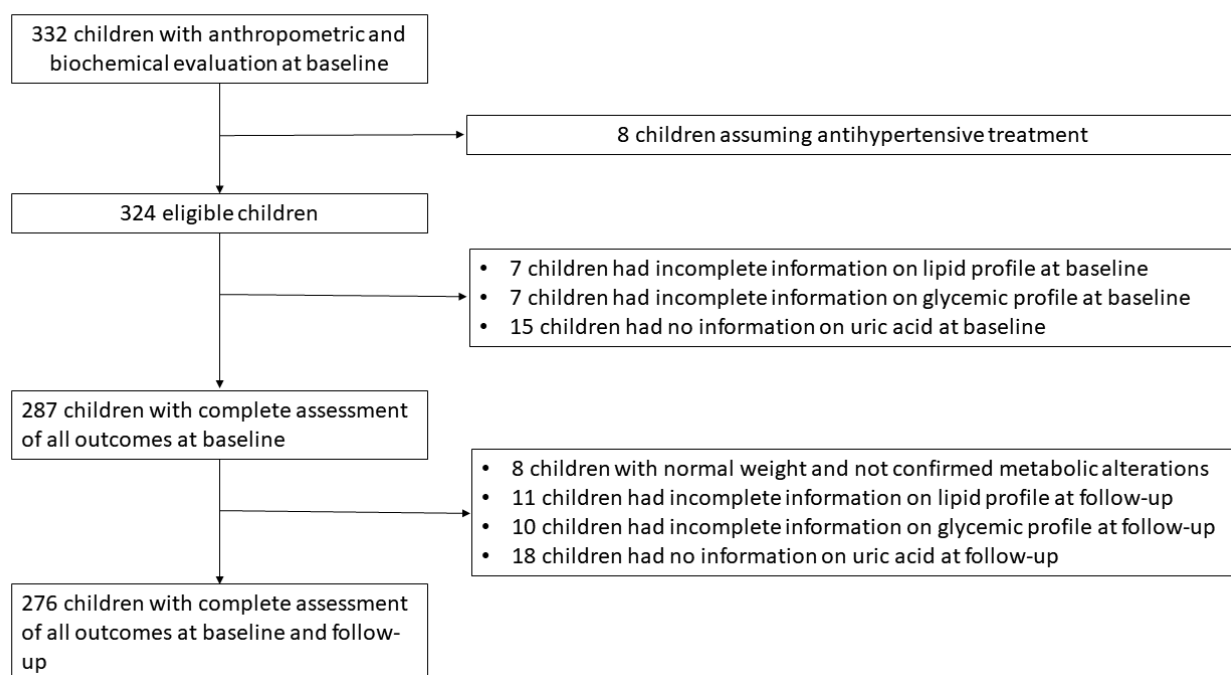

Please note: a few individuals had more than one data point missing.

Supplement: s1 [file s1]
